# Supplementary material for: Impact of a Live Attenuated Classical Swine Fever Virus Introduced to Jeju Island, a CSF-Free Area
Source: MDPI journal article supplement (doi:10.3390/pathogens8040251), 2019-11-20
Supplement: s1 [file s1]

**Supplemental table 3.** Positively selected sites and omega values for the Jeju LOM strains.

| Group                           | Strains         | Homology<br>nt/aa (%)   | Omega<br>value | Positively selected sites (aa position)<br>(*P>95%; **P>99%) |                                                  |
|---------------------------------|-----------------|-------------------------|----------------|--------------------------------------------------------------|--------------------------------------------------|
|                                 |                 |                         |                | NEB <sup>a</sup>                                             | BEB <sup>b</sup>                                 |
| Jeju LOM strains<br>(2004–2007) | JJ04LOM-Tamra01 | 98.8–99.2/<br>99.2–99.4 | 0.14088        | -                                                            | 237, 259, 577,<br>2464                           |
|                                 | JJ05LOM-KSM01   |                         |                |                                                              |                                                  |
|                                 | JJ06LOM-JSY01   |                         |                |                                                              |                                                  |
|                                 | JJ07LOM-JSM01   |                         |                |                                                              |                                                  |
|                                 | JJ07LOM-JSG02   |                         |                |                                                              |                                                  |
| Jeju LOM strains<br>(2014–2018) | JJ14LOM-WSH01   | 98.2–99.4<br>/99.1–99.6 | 0.16196        | **564                                                        | 173, 176, 386,<br>564, 1337, 2676,<br>2988, 3605 |
|                                 | JJ16LOM-YYM02   |                         |                |                                                              |                                                  |
|                                 | JJ16LOM-WSH03   |                         |                |                                                              |                                                  |
|                                 | JJ16LOM-YJK08   |                         |                |                                                              |                                                  |
|                                 | JJ17LOM-PYS03   |                         |                |                                                              |                                                  |
|                                 | JJ17LOM-KJS09   |                         |                |                                                              |                                                  |
|                                 | JJ17LOM-CCJ04   |                         |                |                                                              |                                                  |
|                                 | JJ17LOM-SJM06   |                         |                |                                                              |                                                  |
|                                 | JJ17LOM-IGS07   |                         |                |                                                              |                                                  |
|                                 | JJ17LOM-IGS08   |                         |                |                                                              |                                                  |
|                                 | JJ17LOM-LHH10   |                         |                |                                                              |                                                  |
|                                 | JJ17LOM-JSJ12   |                         |                |                                                              |                                                  |
|                                 | JJ17LOM-HSJ13   |                         |                |                                                              |                                                  |
|                                 | JJ18LOM-KGS01   |                         |                |                                                              |                                                  |
|                                 | JJ18LOM-KYN02   |                         |                |                                                              |                                                  |
|                                 | JJ18LOM-PIC03   |                         |                |                                                              |                                                  |

<sup>a</sup> Naive Empirical Bayes (NEB) analysis; <sup>b</sup> Bayes Empirical Bayes (BEB) analysis.
