# Supplementary material for: Impact of a Live Attenuated Classical Swine Fever Virus Introduced to Jeju Island, a CSF-Free Area
Source: MDPI journal article supplement (doi:10.3390/pathogens8040251), 2019-11-20
Supplement: s1 [file s1]

**Supplemental Table 1.** Amino acid differences between commercial LOM vaccine strains and Jeju LOM strains (2004–2007).

| Vaccine                                 | Year | Strain<br>(Accession no) | Amino acid position |     |     |     |      |      |      |      |      |      |      |      |      |
|-----------------------------------------|------|--------------------------|---------------------|-----|-----|-----|------|------|------|------|------|------|------|------|------|
|                                         |      |                          | Erns                |     | E1  |     | E2   |      | NS3  |      | NS4B |      | NS5A |      | NS5B |
|                                         |      |                          | 386                 | 480 | 577 | 584 | 1053 | 1065 | 1165 | 1976 | 2352 | 2378 | 2383 | 2816 | 3312 |
| Commercial<br>LOM<br>vaccine<br>strains | 1987 | LOM-850                  | D                   | R   | V   | E   | I    | L    | K    | I    | A    | M    | V    | N    | H    |
|                                         | 2002 | LOM (EU789580)           | -                   | -   | -   | -   | -    | -    | -    | -    | -    | -    | -    | -    | -    |
|                                         |      | 16LOM-GC00               | -                   | -   | -   | V   | -    | -    | -    | -    | -    | -    | -    | -    | -    |
|                                         |      | 16LOM-JY00               | -                   | -   | -   | -   | -    | -    | -    | -    | -    | -    | -    | -    | -    |
|                                         | 2016 | 16LOM-KM00               | -                   | -   | -   | -   | -    | -    | -    | -    | -    | -    | -    | -    | -    |
|                                         |      | 16LOM-KR00               | -                   | -   | -   |     | -    | -    | -    | -    | -    | -    | -    | -    | -    |
| Jeju LOM<br>strains                     | 2004 | JJ04LOM-Tamra01          | -                   | -   | A   | V   | -    | -    | -    | -    | -    | L    | A    | -    | -    |
|                                         | 2005 | JJ05LOM-KSM01            | N                   | G   | M   | V   | -    | S    | R    | -    | V    | L    | A    | T    | -    |
|                                         | 2006 | JJ06LOM-JSY01            | N                   | G   | M   | V   | M    | S    | R    | V    | V    | L    | A    | T    | Y    |
|                                         |      | JJ07LOM-JSM01            | N                   | G   | M   | V   | M    | S    | R    | V    | V    | L    | A    | T    | Y    |
|                                         | 2007 | JJ07LOM-JSG02            | N                   | G   | M   | V   | M    | S    | R    | V    | V    | L    | A    | T    | Y    |

LOM-850: live attenuated CSF vaccine, original master seed distributed from APQA to animal medical veterinary companies (AMVC) in South Korea in 1987; LOM (EU789580); several hundred passages of the LOM850 strain in PK-15 cells. 16LOM-GC00, 16LOM-JY00, 16LOM-KM00, and 16LOM-KR00: commercial CSF vaccines from four AMVCs collected from the market in 2016.
