# Supplementary material for: Impact of a Live Attenuated Classical Swine Fever Virus Introduced to Jeju Island, a CSF-Free Area
Source: MDPI journal article supplement (doi:10.3390/pathogens8040251), 2019-11-20
Supplement: s1 [file s1]

**Supplemental table 2.** Amino acid differences between commercial LOM vaccine strains and Jeju LOM strains (2014–2018).

| Vaccine                        | Year          | Strain<br>(Accession no) | Amino acid position |     |      |     |     |      |      |      |      |      |      |      |      |      |      |   |
|--------------------------------|---------------|--------------------------|---------------------|-----|------|-----|-----|------|------|------|------|------|------|------|------|------|------|---|
|                                |               |                          | Npro                |     | Erns |     | E1  |      | NS3  |      | NS4B |      | NS5A |      | NS5B |      |      |   |
|                                |               |                          | 57                  | 143 | 351  | 476 | 651 | 1381 | 1584 | 2006 | 2348 | 2371 | 2398 | 2483 | 2978 | 3409 | 3786 |   |
| Commercial LOM vaccine strains | 1987          | LOM-850                  | K                   | L   | Y    | R   | I   | V    | H    | K    | M    | T    | I    | V    | A    | N    | S    |   |
|                                | 2002          | LOM (EU789580)           | -                   | -   | -    | -   | -   | -    | -    | -    | -    | -    | -    | -    | -    | -    | -    |   |
|                                | 2016          | 16LOM-GC00               | -                   | -   | -    | -   | -   | -    | -    | -    | -    | -    | -    | -    | -    | -    | -    |   |
|                                |               | 16LOM-JY00               | -                   | -   | -    | -   | -   | -    | -    | -    | -    | -    | -    | -    | -    | -    | -    |   |
|                                |               | 16LOM-KM00               | -                   | -   | -    | -   | -   | -    | -    | -    | -    | -    | -    | -    | -    | -    | -    |   |
|                                |               | 16LOM-KR00               | -                   | -   | -    | -   | -   | -    | -    | -    | -    | -    | -    | -    | -    | -    | -    |   |
| Jeju LOM strains               | 2014          | JJ14LOM-WSH01            | -                   | -   | -    | -   | T   | -    | N    | -    | -    | -    | -    | A    | -    | -    | -    |   |
|                                | 2016          | JJ16LOM-YYM02            | -                   | -   | -    | -   | -   | -    | -    | -    | -    | -    | -    | A    | -    | -    | -    |   |
|                                |               | JJ16LOM-WSH03            | R                   | Q   | H    | S   | T   | I    | N    | I    | I    | I    | M    | A    | T    | S    | N    |   |
|                                |               | JJ16LOM-YJK08            | R                   | Q   | H    | S   | T   | I    | N    | I    | I    | I    | M    | A    | T    | S    | N    |   |
|                                | 2017          | JJ17LOM-PYS03            | R                   | Q   | H    | S   | T   | I    | N    | I    | I    | I    | M    | A    | T    | S    | N    |   |
|                                |               | JJ17LOM-KJS09            | R                   | Q   | H    | S   | T   | I    | N    | I    | I    | I    | M    | A    | T    | S    | N    |   |
|                                |               | JJ17LOM-CCJ04            | R                   | Q   | H    | S   | T   | I    | N    | I    | I    | I    | M    | A    | T    | S    | N    |   |
|                                |               | JJ17LOM-SJM06            | R                   | Q   | H    | S   | T   | I    | N    | I    | I    | I    | M    | A    | T    | S    | N    |   |
|                                |               | JJ17LOM-IGS07            | R                   | Q   | H    | S   | T   | I    | N    | I    | I    | I    | M    | A    | T    | S    | N    |   |
|                                |               | JJ17LOM-IGS08            | R                   | Q   | H    | S   | T   | I    | N    | I    | I    | I    | M    | A    | T    | S    | N    |   |
|                                |               | JJ17LOM-LHH10            | -                   | -   | -    | -   | -   | -    | -    | -    | -    | -    | -    | -    | -    | -    | -    |   |
|                                |               | JJ17LOM-JSJ12            | R                   | Q   | H    | S   | T   | I    | N    | I    | I    | I    | M    | A    | T    | S    | N    |   |
|                                |               | JJ17LOM-HSJ13            | R                   | Q   | H    | S   | T   | I    | N    | I    | I    | I    | M    | A    | T    | S    | N    |   |
|                                |               | 2018                     | JJ18LOM-KGS01       | R   | Q    | H   | S   | T    | I    | N    | I    | I    | I    | M    | A    | T    | S    | N |
|                                |               |                          | JJ18LOM-KYN02       | R   | Q    | H   | S   | T    | I    | N    | I    | I    | I    | M    | A    | T    | S    | N |
|                                | JJ18LOM-PIC03 |                          | R                   | Q   | -    | -   | -   | -    | -    | -    | I    | I    | -    | A    | -    | -    | -    |   |

LOM-850: live attenuated CSF vaccine, original master seed distributed from APQA to animal medical veterinary companies (AMVC) in South Korea in 1987; LOM (EU789580): several hundred passages of the LOM850 strain in PK-15 cells. 16LOM-GC00, 16LOM-JY00, 16LOM-KM00, and 16LOM-KR00: commercial CSF vaccines of from four AMVCs collected from the market in 2016.
